# Supplementary material for: Optimizing cooperation between general practitioners, occupational health and rehabilitation physicians in Germany: a qualitative study
Source: PubMed Central journal article supplement (PMC5640724; doi:10.1007/s00420-017-1239-6), 2017-07-05

# Category system used for coding the transcripts

This figure describes the category system with the main categories, categories and subcategories.

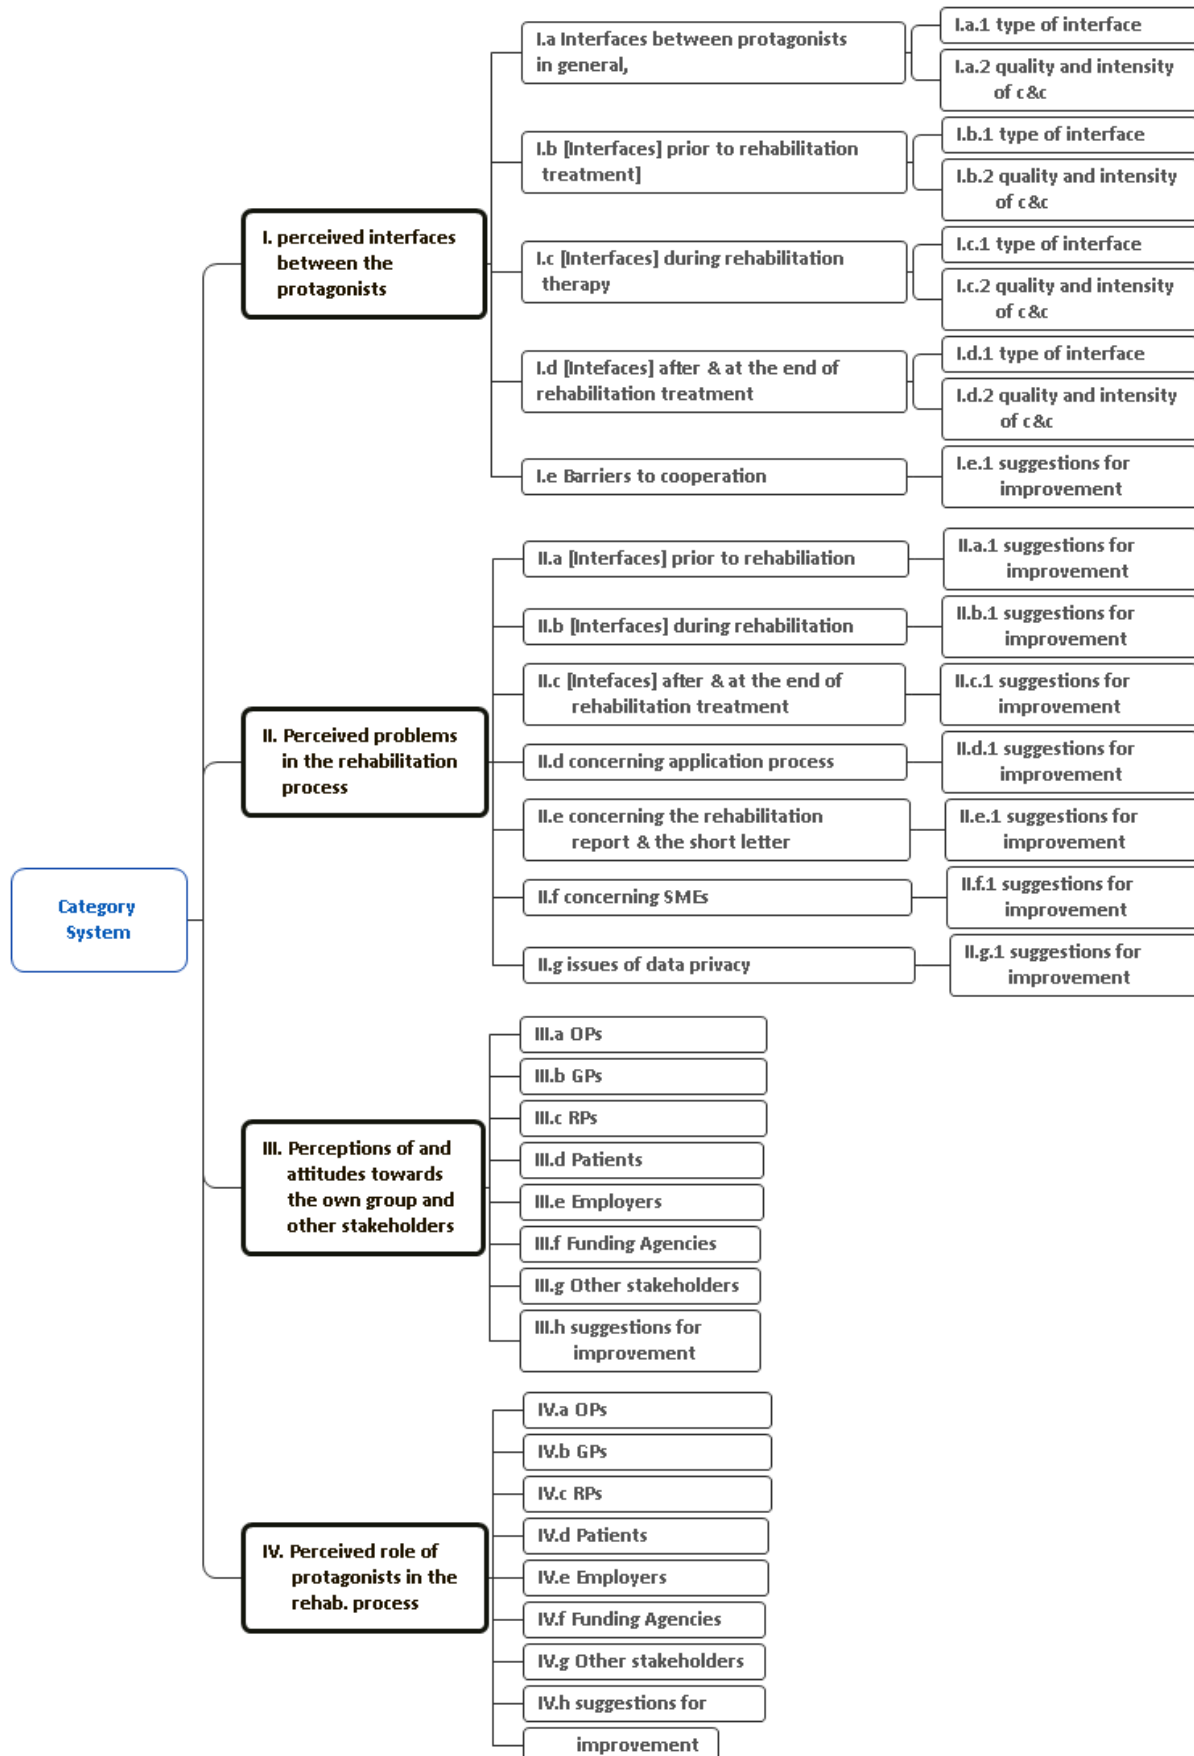

Supplement: 420_2017_1239_MOESM1_ESM.pdf [file 420_2017_1239_MOESM1_ESM.pdf]
